# Supplementary material for: Estimating the Impact and Cost of the WHO 2010 Recommendations for Antiretroviral Therapy
Source: Hindawi journal article supplement (doi:10.1155/2011/738271), 2010-11-29
Supplement: f1 [file 738271.f1.pdf]

## **ANNEX TABLE**

[illegible]
